# Supplementary material for: Synthesis of large single crystals of analcime in a template-free system
Source: Royal Society of Chemistry journal article supplement (doi:10.1039/d2ce00338d), 2022-01-01
Supplement: d2ce00338d1.pdf [file d2ce00338d1.pdf]

# Synthesis of large single crystal of analcime in a template-free system

Lang Sun<sup>a,b</sup>, Xintong Xu<sup>a,b\*</sup>, Dalin Sun<sup>a,b</sup>, Shaowen Chu<sup>a,b</sup>, Jiaqi Chen<sup>a,b</sup>, Wentao Shi<sup>a,b</sup>, Juan Lu<sup>b</sup> and Shuangchen Ruan<sup>a,b\*</sup>

<sup>a</sup> Shenzhen Key Laboratory of Laser Engineering, Shenzhen University, Shenzhen, 518060, P.R. China

<sup>b</sup> College of New Materials and New Energies, Shenzhen Technology University, Shenzhen, 518118, P.R. China

\* Corresponding author: [scruan@sztu.edu.cn](mailto:scruan@sztu.edu.cn)(Shuangchen Ruan) ;

Corresponding author : [xuxintong@sztu.edu.cn](mailto:xuxintong@sztu.edu.cn) (Xintong Xu).

*Supplementary Information* contains:

The insert SEM images in the manuscript ;

The raw EDS data of the best ANA crystal.

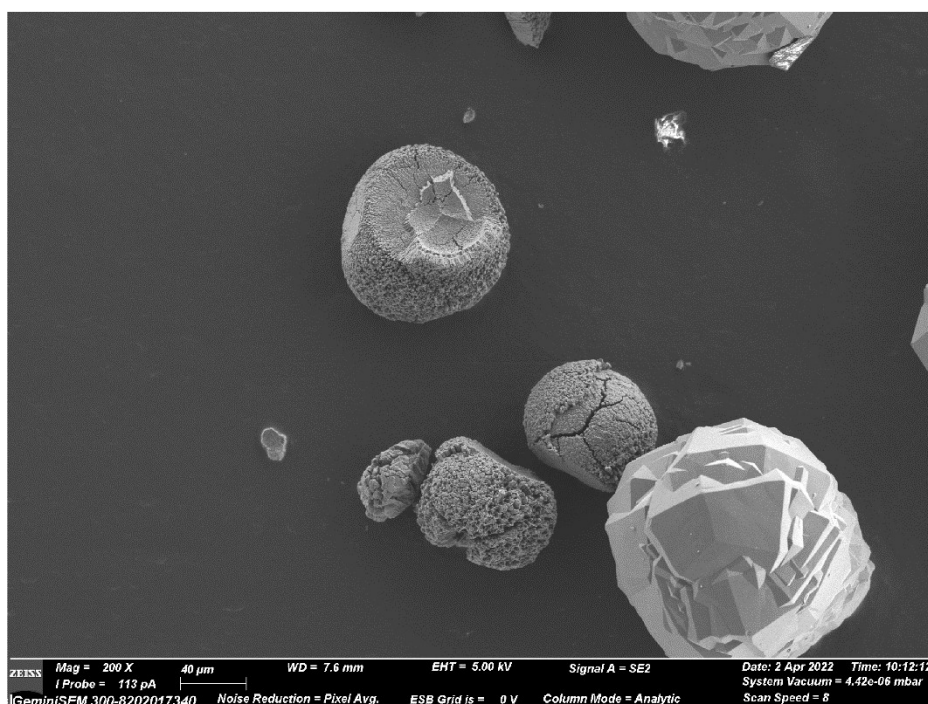

Fig. S1. The insert image of Fig. 2a

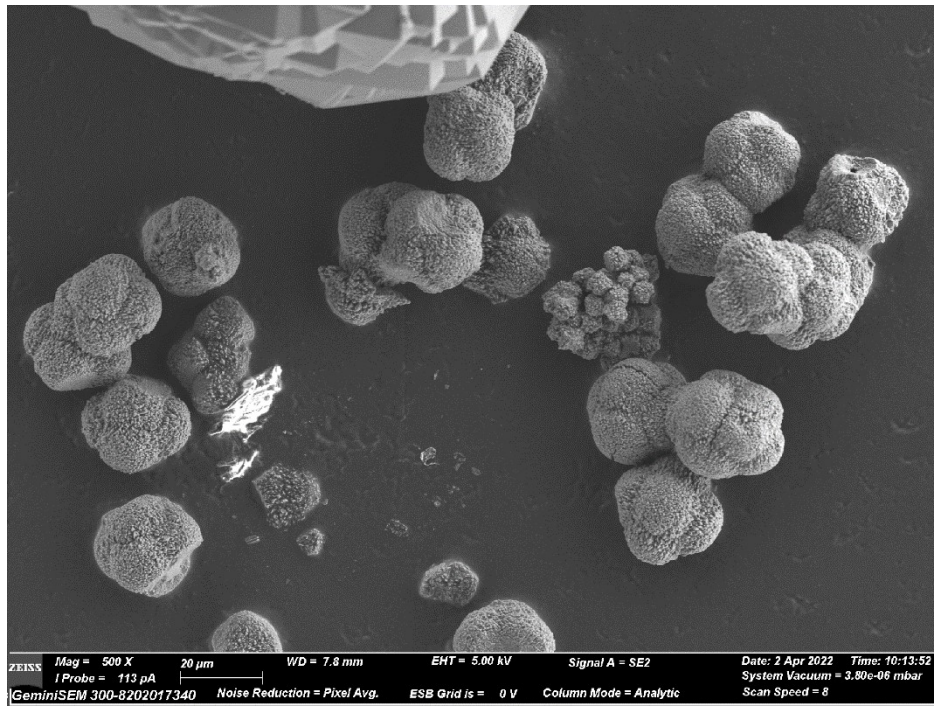

Fig. S2. The insert image of Fig. 2b

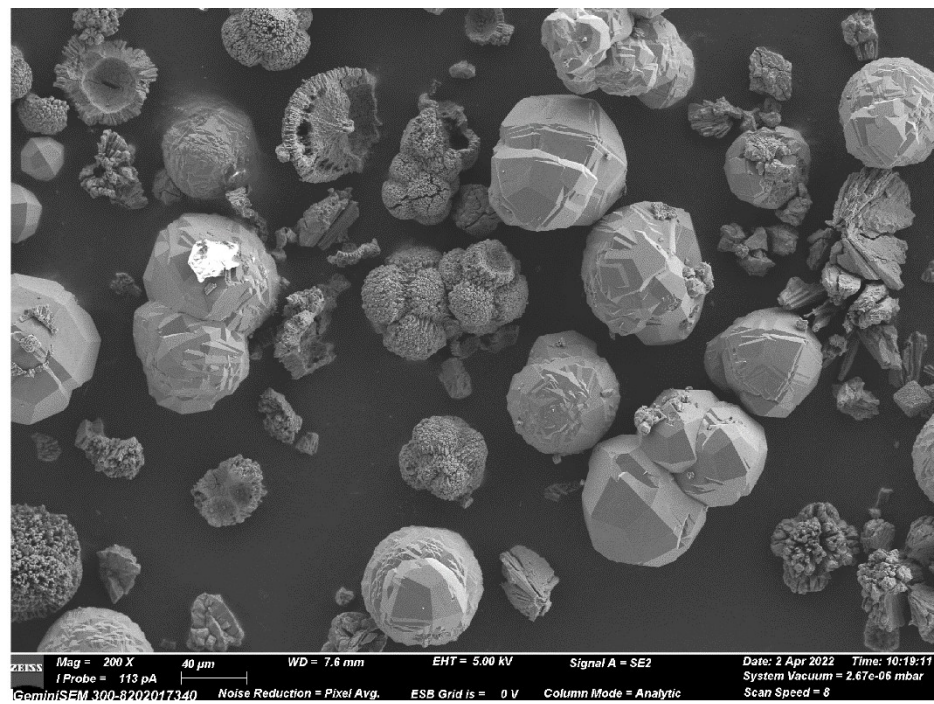

Fig. S3. The insert image of Fig. 4a

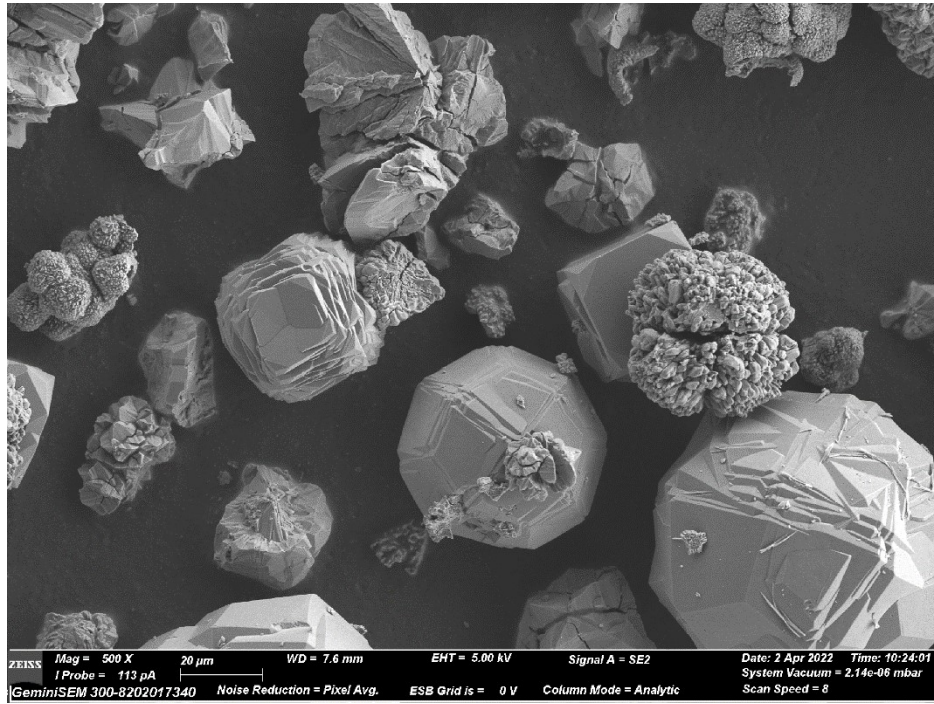

Fig. S4. The insert image of Fig. 6a

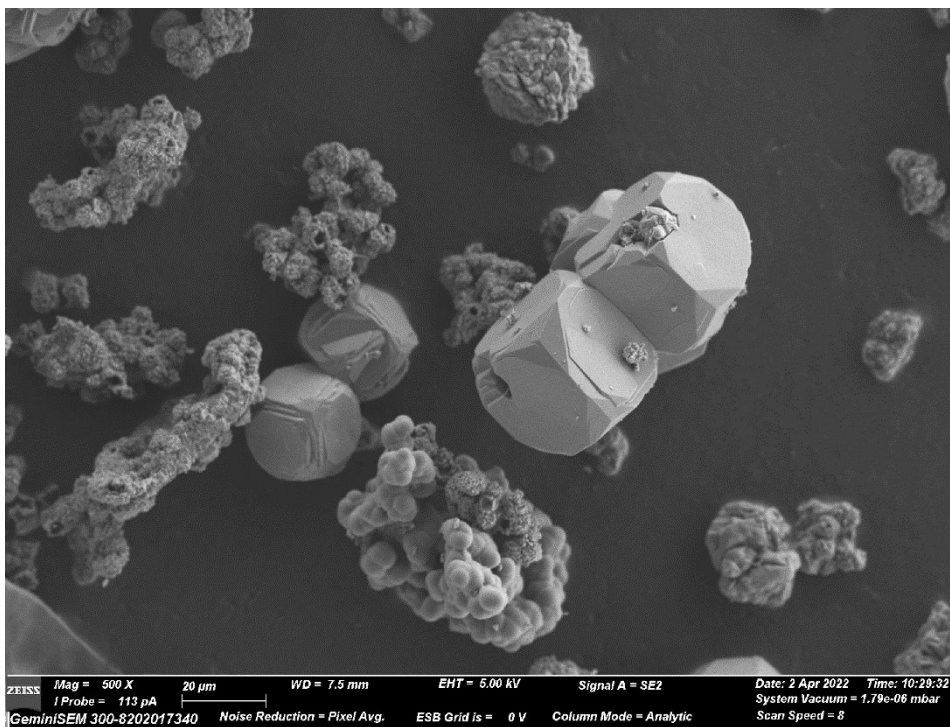

Fig. S5. The insert image of Fig. 8a

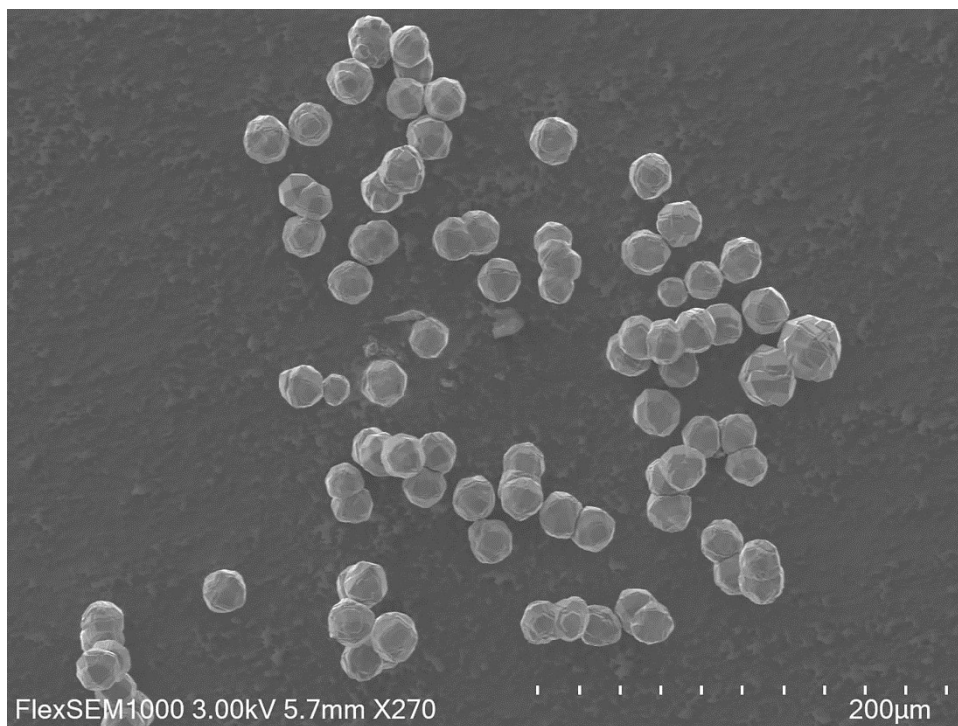

Fig. S6. The insert image of Fig. 8b

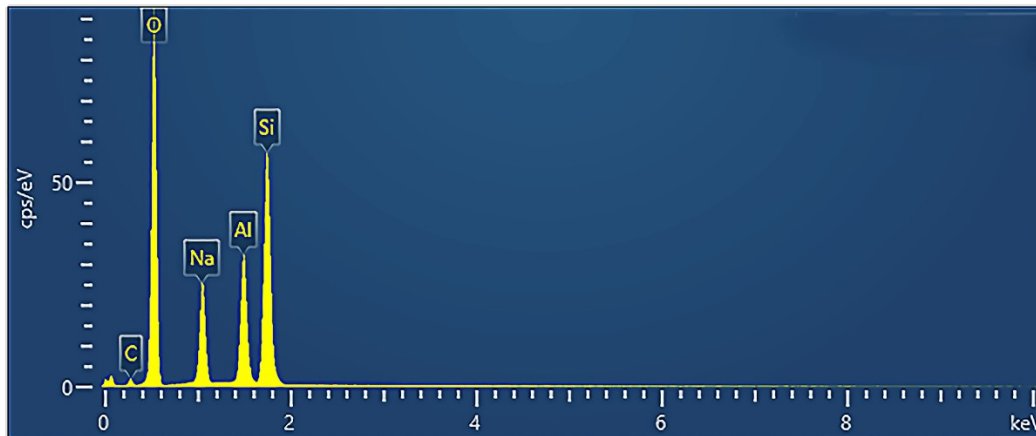

Fig. S7. The EDS data of the best ANA crystal.
